### Supplementary material 3:

A-mutation in the stem part of the hairpin

B-mutation in the loop part of the hairpin

**A**

|        |         |
|--------|---------|
| 28875: | G       |
| 28876: | C       |
| 28877: | A       |
| 28878: | G       |
| 28879: | T       |
| 28880: | AGGGGAA |
| ...    | -    C  |
| 28894: | TCCTCTT |
| 28895: | G       |
| 28896: | C       |
| 28897: | T       |
| 28898: | A       |
| 28899: | G       |

**28881**



**B**

|        |          |
|--------|----------|
| 28869: | C        |
| 28870: | A        |
| 28871: | G        |
| 28872: | G        |
| 28873: | C        |
| 28874: | AGCAGT G |
| ...    | -        |
| 28891: | TCTTCA G |
| 28892: | C        |
| 28893: | C        |
| 28894: | T        |
| 28895: | G        |
| 28896: | C        |

**28881**



Source: https://oup.silverchair-cdn.com/oup/backfile/Content_public/Journal/bib/22/2/10.1093_bib_bbaa385/2/sm_03_bbaa385.pdf
